# Supplementary material for: Biodiversity and Variations of Arbuscular Mycorrhizal Fungi Associated with Roots along Elevations in Mt. Taibai of China
Source: MDPI journal article supplement (doi:10.3390/d14080626), 2022-08-06
Supplement: s1 [file s1]

Supplementary Materials

Table S1. Plant species at different altitudes in Mt. Taibai.

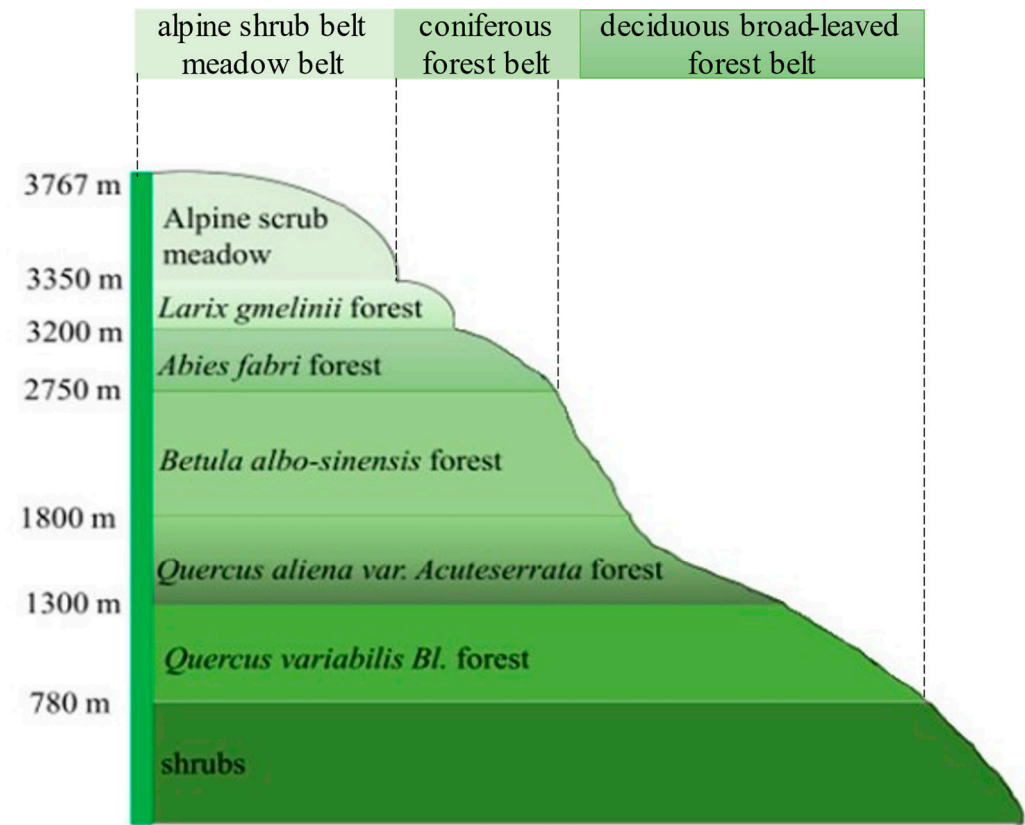

Table S2. The distribution of AMF order, family, genus, and the number of AMF species aoutOTU among different altitudes.

| Elevation<br>(m) | Soil types       | vegetation<br>types | Main plant species                                                                                                                                                                                                                                                                                                                                                                                                                                                          |
|------------------|------------------|---------------------|-----------------------------------------------------------------------------------------------------------------------------------------------------------------------------------------------------------------------------------------------------------------------------------------------------------------------------------------------------------------------------------------------------------------------------------------------------------------------------|
| < 780            | Cinnamon<br>soil | shrubs              | <i>Acer grosseri</i> , <i>Agrimonia pilosa</i> , <i>Artemisia viridissima</i> , <i>Campylotropis prainii</i> , <i>Celastrus orbiculatus</i> , <i>Cercis chinensis</i> , <i>Cotinus coggygria</i> , <i>Diospyros lotus</i> , <i>Galium handelii</i> , <i>Lespedeza juncea</i> , <i>Lonicera ferdinandii</i> , <i>Lonicera hispida</i> , <i>Quercus aliena</i> var. <i>acuteserrata</i> , <i>Quercus variabilis</i> , <i>Rosa tsinglingensis</i> , <i>Thalictrum robustum</i> |
| 800-1300         | Cinnamon<br>soil | forest              | <i>Acer grosseri</i> , <i>Carex japonica</i> , <i>Carpinus cordata</i> , <i>Carpinus shensiensis</i> , <i>Cotinus coggygria</i> , <i>Litsea pungens</i> , <i>Paederia scandens</i> , <i>Quercus aliena</i> var. <i>acuteserrata</i> , <i>Quercus variabilis</i> , <i>Rosa tsinglingensis</i> , <i>Rubia cordifolia</i> , <i>Rubus</i> sp., <i>Smilax discotis</i> , <i>Spiraea blumei</i> , <i>Viburnum dilatatum</i>                                                       |
| 1350             | Cinnamon<br>soil | forest              | <i>Acanthopanax stenophyllum</i> , <i>Acer grosseri</i> , <i>Carpinus turczaninowii</i> , <i>Deyeuxia sinelator</i> , <i>Litsea pungens</i> , <i>Quercus variabilis</i> , <i>Sanguisorba officinalis</i> , <i>Scutellaria honanensis</i> , <i>Spiraea pubescens</i> , <i>Toxicodendron verniciflum</i> , <i>Viola mandshurica</i>                                                                                                                                           |
| 1500             | Brown<br>soil    | forest              | <i>Acer grosseri</i> , <i>Agrimonia pilosa</i> , <i>Akebia trifoliata</i> , <i>Carex siderosticta</i> , <i>Celtis koraiensis</i> , <i>Lespedeza formosa</i> , <i>Litsea pungens</i> , <i>Litsea tsinlingensis</i> , <i>Lonicera japonica</i> , <i>Quercus aliena</i> var. <i>acuteserrata</i> , <i>Smilax scobinicaulis</i> , <i>Sorbus alnifolia</i> , <i>Spiraea mongolica</i> , <i>Toxicodendron verniciflum</i>                                                         |
| 1650             | Brown<br>soil    | forest              | <i>Acer grosseri</i> , <i>Acer robustum</i> , <i>Acer shankanensis</i> , <i>Agrimonia pilosa</i> , <i>Carex siderosticta</i> , <i>Crataegus kansuensis</i> , <i>Festuca modesta</i> , <i>Lespedeza formosa</i> , <i>Litsea pungens</i> , <i>Lonicera japonica</i> , <i>Maddenia hypolena</i> , <i>Quercus aliena</i> var. <i>Acuteserrata</i> , <i>Rubus</i> sp.                                                                                                            |
| 1800             | Brown<br>soil    | forest              | <i>Acer shankanensis</i> , <i>Berberis dolichobotrys</i> , <i>Carex japonica</i> , <i>Carpinus cordata</i> , <i>Cotoneaster divariacatus</i> , <i>Euonymus alatus</i> , <i>Euonymus phellomanus</i> , <i>Euonymus verucosoides</i> , <i>Lespedeza formosa</i> , <i>Lindera obtusiloba</i> , <i>Quercus liaotungensis</i> , <i>Rubia cordifolia</i> , <i>Sorbus alnifolia</i> , <i>Thalictrum robustum</i>                                                                   |
| 1950             | Brown<br>soil    | forest              | <i>Acanthopanax henryi</i> , <i>Acer henryi</i> , <i>Ampelopsis megalophylla</i> , <i>Carpinus cordata</i> , <i>Cornus controversa</i> , <i>Fraxinus inopinata</i> , <i>Lindera obtusiloba</i> , <i>Pyrus betulaefolia</i> , <i>Quercus liaotungensis</i> , <i>Rosa swiginzowii</i> , <i>Rubia cordifolia</i> , <i>Sorbaria arborea</i> var. <i>glabrata</i> , <i>Viola mandshurica</i> , <i>Viola</i> sp.                                                                  |

|      |                      |        |                                                                                                                                                                                                                                                                                                                                                                                                                                                                          |
|------|----------------------|--------|--------------------------------------------------------------------------------------------------------------------------------------------------------------------------------------------------------------------------------------------------------------------------------------------------------------------------------------------------------------------------------------------------------------------------------------------------------------------------|
| 2100 | Brown soil           | forest | <i>Acer grosseri</i> , <i>Acer miaotaiensis</i> , <i>Carex japonica</i> , <i>Carpinus cordata</i> , <i>Litsea pungens</i> , <i>Lonicera serreana</i> , <i>Pinus armandii</i> , <i>Populus purdomii</i> , <i>Quercus liaotungensis</i> , <i>Rosa davurica</i> , <i>Rubia cordifolia</i> , <i>Spiraea blumei</i> , <i>Viburnum dilatatum</i>                                                                                                                               |
| 2250 | Brown soil           | forest | <i>Abelia engleriana</i> , <i>Betula albosinensis</i> , <i>Crataegus hupehensis</i> , <i>Deyeuxia sinelator</i> , <i>Euphorbia pekinensis</i> , <i>Fraxinus mandschurica</i> , <i>Lonicera ferdinandii</i> , <i>Pinus armandii</i> , <i>Quercus liaotungensis</i> , <i>Rosa swiginzowii</i> , <i>Salix characta</i> , <i>Sorbaria arborea</i> var. <i>Glabrata</i> , <i>Spiraea mongolica</i> , <i>Viola pekinensis</i>                                                  |
| 2400 | Brown soil           | forest | <i>Abelia engleriana</i> , <i>Acer henryi</i> , <i>Betula albosinensis</i> , <i>Corylus ferox</i> , <i>Corylus heterophylla</i> var. <i>Sutchuenensis</i> , <i>Deyeuxia sinelator</i> , <i>Euonymus venosus</i> , <i>Euphorbia pekinensis</i> , <i>Fraxinus inopinata</i> , <i>Fraxinus mandschurica</i> , <i>Lonicera ferdinandii</i> , <i>Lonicera serreana</i> , <i>Quercus liaotungensis</i> , <i>Viola pekinensis</i>                                               |
| 2550 | Brown soil           | forest | <i>Acer giraldii</i> , <i>Betula albosinensis</i> , <i>Carex japonica</i> , <i>Hydrangea bretschneideri</i> , <i>Lonicera ferdinandii</i> , <i>Lonicera japonica</i> , <i>Lonicera serreana</i> , <i>Lonicera tangutica</i> , <i>Phlomis umbrosa</i> var. <i>Stenocalyx</i> , <i>Pinus armandii</i> , <i>Quercus liaotungensis</i> , <i>Rosa omeiensis</i> , <i>Rubia membranacea</i> , <i>Rubus</i> sp., <i>Sorbus koehneana</i>                                        |
| 2700 | Brown soil           | forest | <i>Acer giraldii</i> , <i>Acer mono</i> var. <i>Tricuspis</i> , <i>Betula albo-sinensis</i> var. <i>Septentrionalis</i> , <i>Carex japonica</i> , <i>Euonymus alatus</i> , <i>Fragaria corymbosa</i> , <i>Oxylis corniculata</i> , <i>Rhododendron purdomii</i> , <i>Rosa omeiensis</i> , <i>Rubia cordifolia</i> , <i>Salix paraplesia</i> , <i>Sorbaria arborea</i> var. <i>Glabrata</i> , <i>Sorbus folgneri</i>                                                      |
| 2850 | Dark brown soil      | forest | <i>Abelia engleriana</i> , <i>Abies fargesii</i> , <i>Acer shankanensis</i> , <i>Berberis dolichobotrys</i> , <i>Berberis feddeana</i> , <i>Betula albo-sinensis</i> , <i>Betula albo-sinensis</i> var. <i>Septentrionalis</i> , <i>Carex japonica</i> , <i>Lonicera webbia</i> , <i>Lonicera webbia</i> , <i>Pinus armandii</i> , <i>Potentilla glabra</i> , <i>Rhododendron purdomii</i> , <i>Rubia cordifolia</i> , <i>Sorbus folgneri</i> , <i>Spiraea pubescens</i> |
| 3000 | Dark brown soil      | forest | <i>Abies fargesii</i> , <i>Betula albo-sinensis</i> var. <i>Septentrionalis</i> , <i>Callicarpa japonica</i> var. <i>angustata</i> , <i>Cardamine macrophylla</i> , <i>Carex japonica</i> , <i>Fragaria gracilis</i> , <i>Larix chinensis</i> , <i>Ligularia dentata</i> , <i>Lonicera serreana</i> , <i>Oxylis corniculata</i> , <i>Potentilla glabra</i> , <i>Rosa tsinglingensis</i> , <i>Rubus amabilis</i> , <i>Spiraea mongolica</i> , <i>Viola biflora</i>        |
| 3150 | Mountain meadow soil | forest | <i>Abies chensiensis</i> , <i>Acanthopanax giraldii</i> , <i>Berberis cium-serrata</i> , <i>Cardamine macrophylla</i> , <i>Carex japonica</i> , <i>Chrysosplenium pilosum</i> var. <i>Valdepilosum</i> , <i>Festuca modesta</i> , <i>Fragaria gracilis</i> , <i>Larix chinensis</i> , <i>Lonicera serreana</i> , <i>Oxylis corniculata</i> , <i>Rhododendron rufum</i> , <i>Rubus</i> sp.                                                                                |
| 3300 | Mountain             | forest | <i>Abies chensiensis</i> , <i>Abies fargesii</i> , <i>Anemone taibaiensis</i> , <i>Berberis cium-serrata</i> , <i>Carex scabrirostris</i> , <i>Festuca</i>                                                                                                                                                                                                                                                                                                               |

|      |                          |                        |                                                                                                                                                                                                                                                                                                                |
|------|--------------------------|------------------------|----------------------------------------------------------------------------------------------------------------------------------------------------------------------------------------------------------------------------------------------------------------------------------------------------------------|
|      | meadow<br>soil           |                        | <i>modesta, Larix chinensis, Lonicera taipeiensis, Lonicera webbiana, Oxylis corniculata, Potentilla glabra, Rhododendron rufun, Saxifraga montana</i>                                                                                                                                                         |
| 3450 | Alpine<br>meadow         | Shrub and<br>grassland | <i>Adenophora stricta, Anaphalis hancockii, Cardamine macrophylla, Carex japonica, Carex scabrirostris, Epilobium palustre, Festuca modesta, Parnassia delavayi, Polygonum sphaerostachyum, Potentilla glabra, Rhododendron capitatum, Salix paraplesia, Saxifraga montana, Spiraea alpina, Viola bifloara</i> |
| 3600 | Alpine<br>meadow<br>soil | Shrub and<br>grassland | <i>Cardamine macrophylla, Carex japonica, Carex scabrirostris, Festuca modesta, Pedicularis giraldiana, Polygonum sphaerostachyum, Potentilla glabra, Rhododendron capitatum, Salix characta, Saussurea iodostegia, Saussurea licentiana, Saxifraga montana</i>                                                |

---
